# Supplementary material for: Enhanced IR-driven photoelectrochemical responses of CdSe/ZnO heterostructures by up-conversion UV/visible light irradiation
Source: Royal Society of Chemistry journal article supplement (doi:10.1039/d0nr00477d), 2020-01-01
Supplement: d0nr00477d1.pdf [file d0nr00477d1.pdf]

## Supplementary Information

# Enhanced IR-driven photoelectrochemical responses of CdSe/ZnO heterostructures by up-conversion UV/visible light irradiation

Joo-Won Lee<sup>a</sup>, Ki-Hyun Cho<sup>b</sup>, Joon-Soo Yoon<sup>a</sup> and Yun-Mo Sung<sup>a,\*</sup>

<sup>a</sup> Department of Materials Science & Engineering

Korea University Anam-ro 145, Seongbuk-gu, Seoul 02841, Republic of Korea

<sup>b</sup> Department of Chemistry,

University of Illinois at Urbana–Champaign, Urbana, Illinois 61801, United States

\*Corresponding author: Prof. Yun-Mo Sung

E-mail address: ymsung@korea.ac.kr

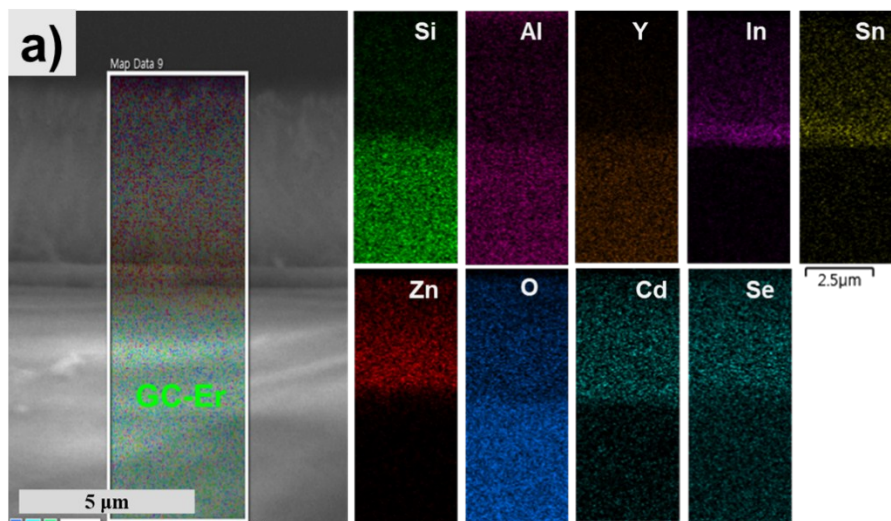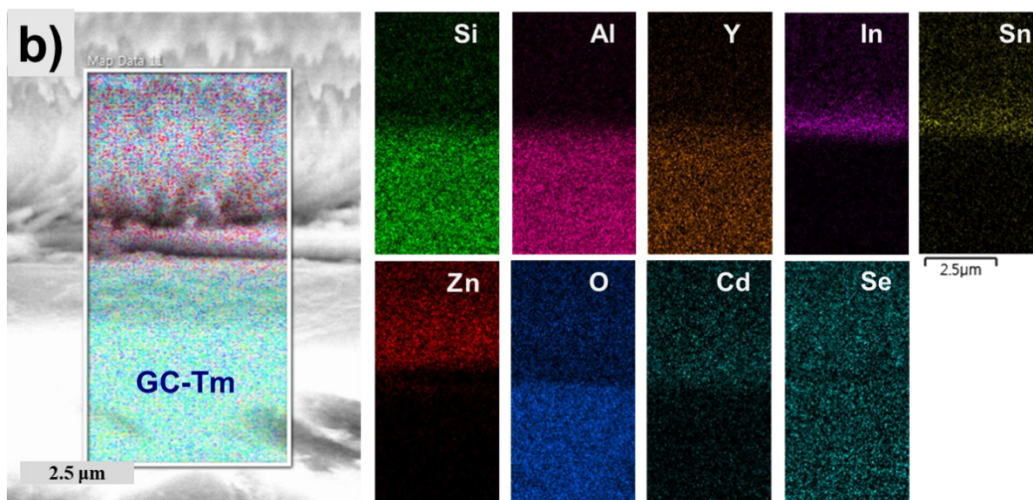

Fig. S1. HR-SEM elemental EDS mapping of CdSe QD/ ZnO NR grown on (a) the Er substrate and (b) the Tm substrate. The elements for EDS analysis are Si, Al, Y, In, Sn, Zn, O, Cd and Se.

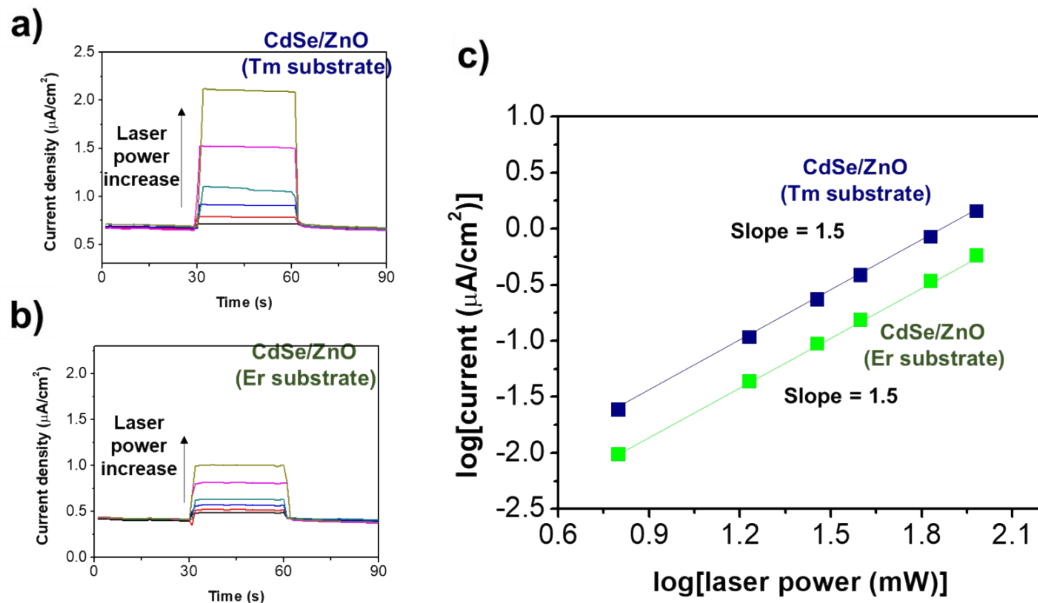

Fig. S2. Current densities under 980 nm illumination of (a) CdSe/ZnO-Tm and (b) CdSe/ZnO-Er with the change of excitation laser power (6.3, 17.1, 28.6, 40, 68 and 100  $\text{mW}/\text{cm}^2$ ). (c) Log-log plots of current density versus excitation laser power for CdSe/ZnO-Tm and CdSe/ZnO-Er.
